# Supplementary material
Source: MDPI journal article supplement (https://www.mdpi.com/2073-4344/12/2/112)
Supplement: s1 [file s1 › catalysts-1541229-supplementary.pdf]

# Supplementary Materials: Monolithic Stirrer Reactors for the Sustainable Production of Dihydroxybenzenes over 3D Printed Fe/ $\gamma$ -Al<sub>2</sub>O<sub>3</sub> Monoliths: Kinetic Modeling and CFD Simulation

Pablo López <sup>1</sup>, Asunción Quintanilla <sup>1,\*</sup>, Alma D. Salazar-Aguilar <sup>2</sup>, Sofía M. Vega-Díaz <sup>2</sup>, Irene Díaz-Herrezuelo<sup>3</sup>, Manuel Belmonte <sup>3</sup> and Jose A. Casas <sup>1</sup>

<sup>1</sup> Chemical Engineering Department, Universidad Autónoma de Madrid, Ctra. Colmenar km 15, 28049 Madrid, Spain; pablo.lopezd@uam.es (P.L.); jose.casas@uam.es (J.A.C.)

<sup>2</sup> Departamento de Ingeniería Química, Tecnológico Nacional de México, Instituto Tecnológico de Celaya, Av. García Cubas Pte # 600 esq. Avenida Tecnológico, 38010 Celaya, Mexico; daniela.salazar@iqcelaya.itc.mx (A.D.S.-A.); sofia.vega@iqcelaya.itc.mx (S.M.V.-D.)

<sup>3</sup> Institute of Ceramics and Glass (ICV-CSIC), Campus de Cantoblanco, C/Kelsen 5, 28049 Madrid, Spain; idiherrez@icv.csic.es (I.D.); mbelmonte@icv.csic.es (M.B.)

\* Correspondence: asun.quintanilla@uam.es; Tel.: +34-914-973-454

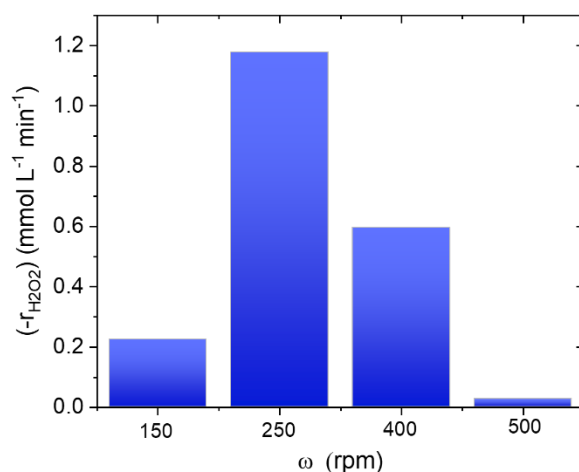

**Figure S1.** Effect of the stirring speed on the initial reaction rate of the H<sub>2</sub>O<sub>2</sub> decomposition in the Fenton reaction. Operating conditions: C<sub>H<sub>2</sub>O<sub>2</sub>,0</sub> = 14.7 mM, C<sub>Fe<sup>2+</sup></sub> = 0.178 mM (from FeCl<sub>2</sub> salt), T = 25 °C and pH<sub>0</sub> = 3 (adjusted with HCl). Further details of this reaction is provided in Section 3.3 of Materials and Methods.

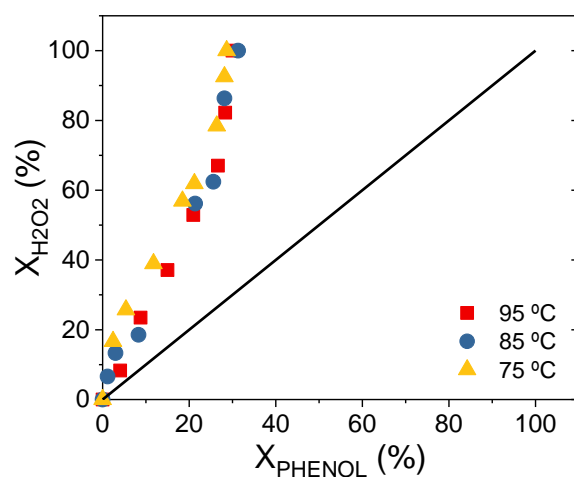

**Figure S2.** Efficiency in the consumption of  $\text{H}_2\text{O}_2$  in the hydroxylation of phenol by  $\text{H}_2\text{O}_2$  over  $3\text{D Fe/Al}_2\text{O}_3$  catalysts.

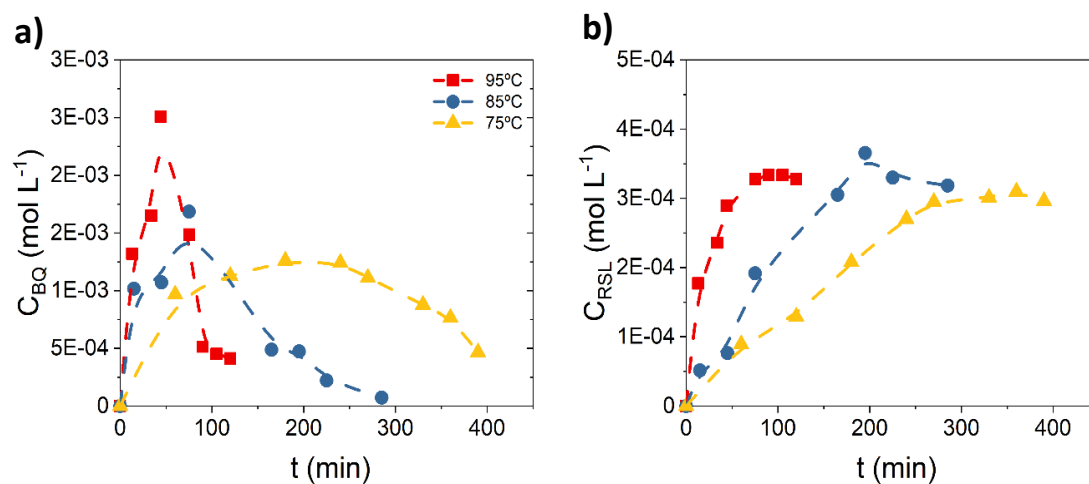

**Figure S3.** Experimental concentration profiles of (a) BQ and (b) RSL at different temperatures. Operating conditions:  $C_{\text{PHENOL},0} = C_{\text{H}_2\text{O}_2,0} = 0.33 \text{ M}$ ,  $W_{\text{CAT}} = 1.1 \text{ g}_{\text{CAT}}$  and  $T = 85\text{--}95 \text{ }^\circ\text{C}$ .

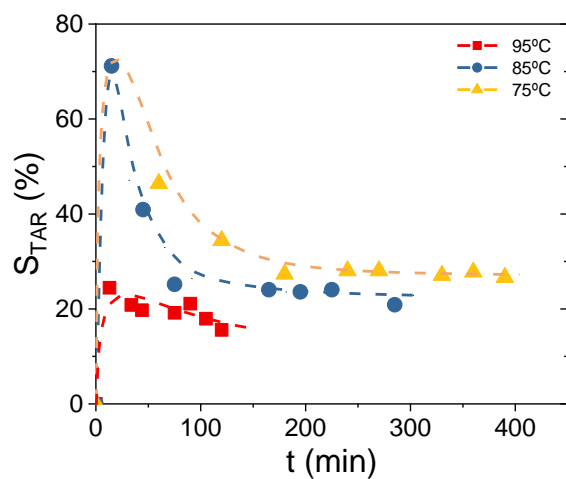

**Figure S4.** Experimental concentration profiles of tar at different temperatures. Operating conditions:  $C_{\text{PHENOL},0} = C_{\text{H}_2\text{O}_2,0} = 0.33 \text{ M}$ ,  $W_{\text{CAT}} = 1.1 \text{ g}_{\text{CAT}}$  and  $T = 85\text{--}95 \text{ }^\circ\text{C}$ .

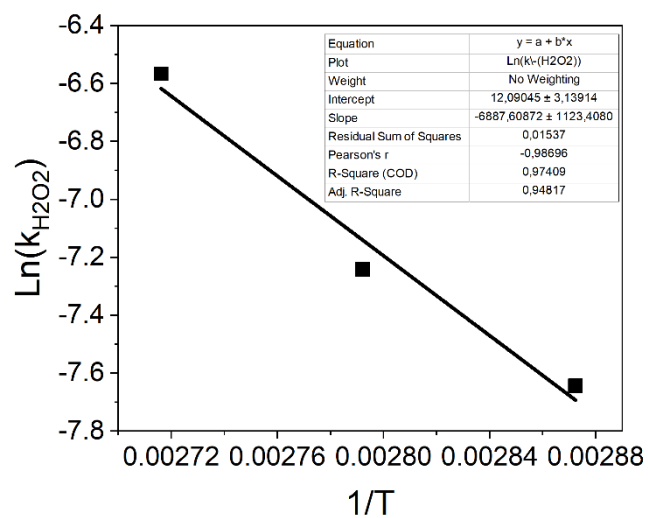

**Figure S5.** Dependence of  $k_{\text{H}_2\text{O}_2}$  with the reaction temperature.

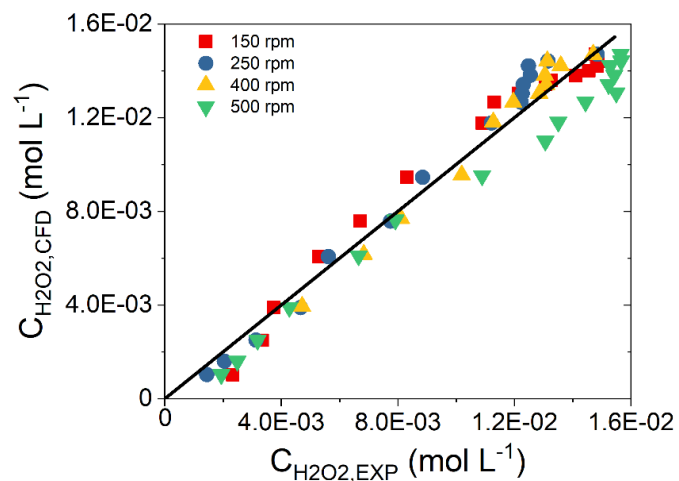

**Figure S6.** Parity plot of experimental and calculated concentrations by CFD assuming laminar flow for the Fenton reaction carried out at different stirring speed.

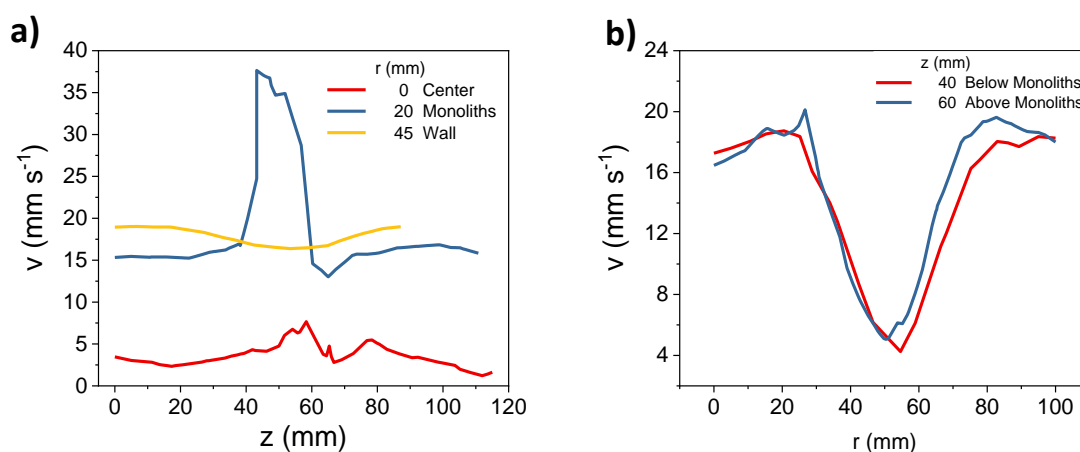

**Figures S7.** (a) Axial and (b) radial velocity profiles at different radii and axial positions, respectively, at  $\omega = 250$  rpm and  $T = 85$  °C

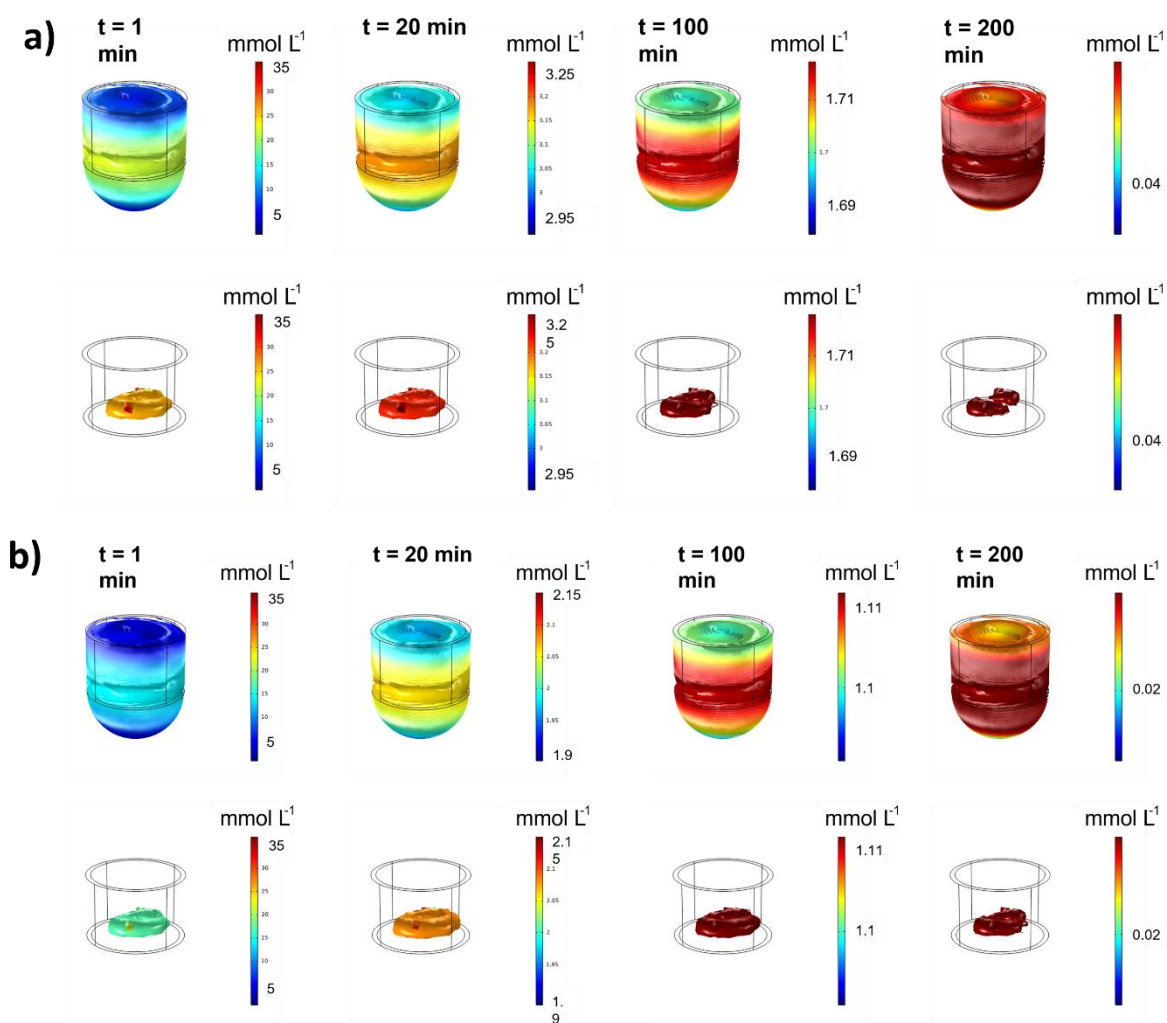

**Figure S8.** Three-dimensional profiles of the concentration isosurface of (a) CTL and (b) HQ during the hydroxylation of phenol by  $\text{H}_2\text{O}_2$  at  $\omega = 250$  rpm and  $85^\circ\text{C}$ .

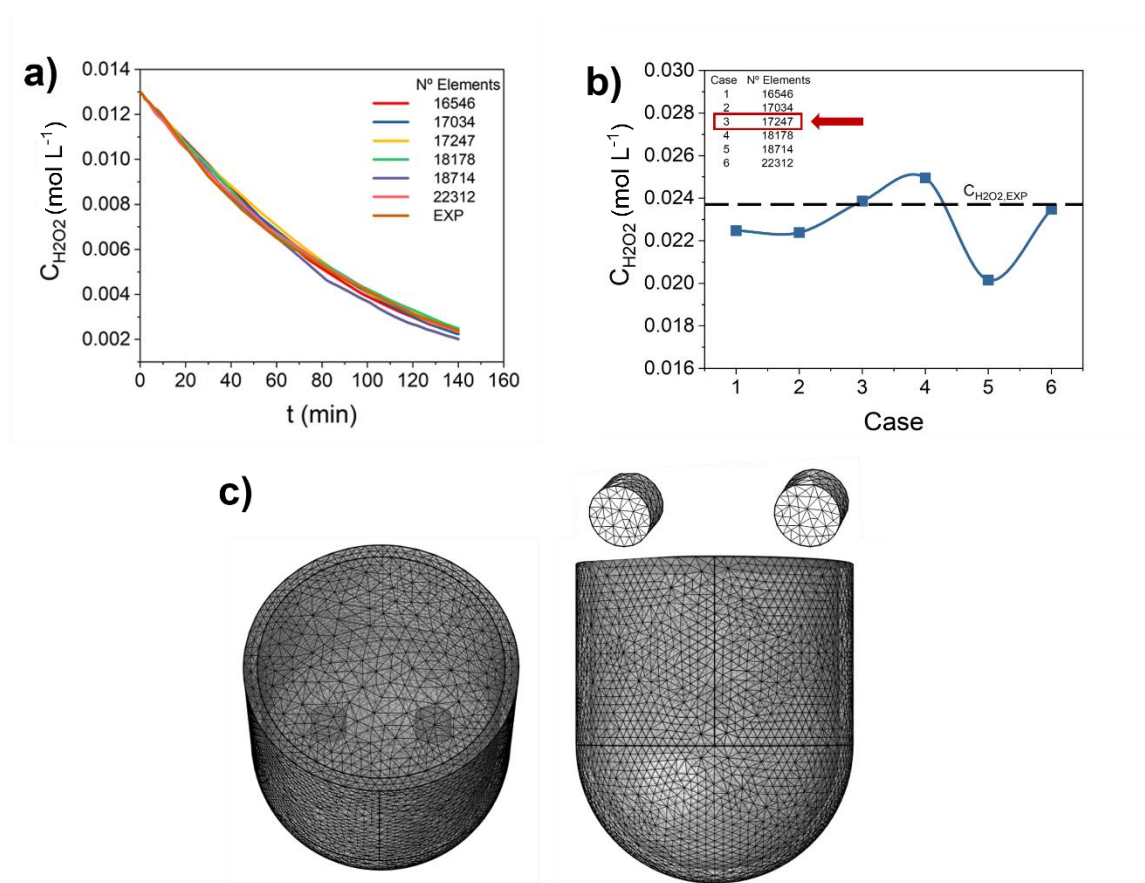

**Figure S9.** Mesh sensitivity analysis in COMSOL Multiphysics® for the SMR: (a) comparison between experimental and CFD concentration for then Fenton reaction at different grid meshes, (b) selection of the Normal grid mesh and (c) appearance of the selected grid mesh. Operating conditions:  $C_{H_2O_2,0} = 13$  mM,  $C_{Fe^{2+}} = 0.178$  mM (from  $FeCl_2$  salt),  $T = 25$  °C,  $pH_0 = 3$  and  $\omega = 250$  rpm.
